# Supplementary material for: Partial oxidation of methane over SSZ-39 zeolites containing iron, copper, and iron–copper mixtures with hydrogen peroxide: selective control of oxygenate formation
Source: Royal Society of Chemistry journal article supplement (doi:10.1039/d5ra04892c), 2025-01-01
Supplement: d5ra04892c1.pdf [file d5ra04892c1.pdf]

**Partial Oxidation of Methane over SSZ-39 Zeolites Containing Iron, Copper, and Iron-Copper Mixtures with Hydrogen Peroxide: Selective Control of Oxygenate Formation**

Jeewan Pokhrel and Daniel F. Shantz\*

Department of Chemical and Biomolecular Engineering,  
Tulane University  
6823 St. Charles Avenue, New Orleans, LA 70118, United States

**Supporting Information**

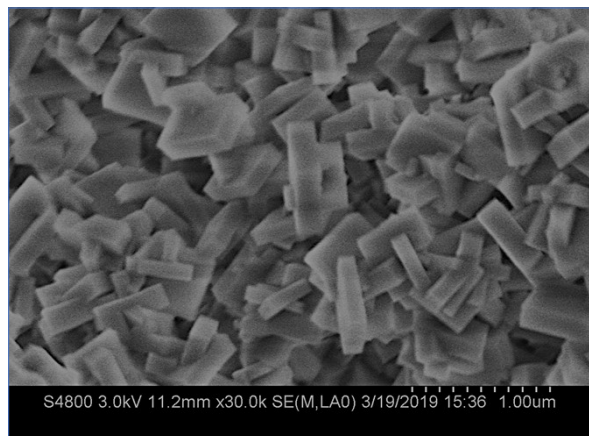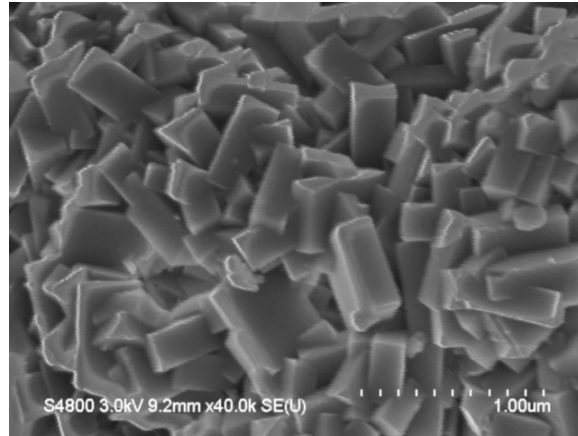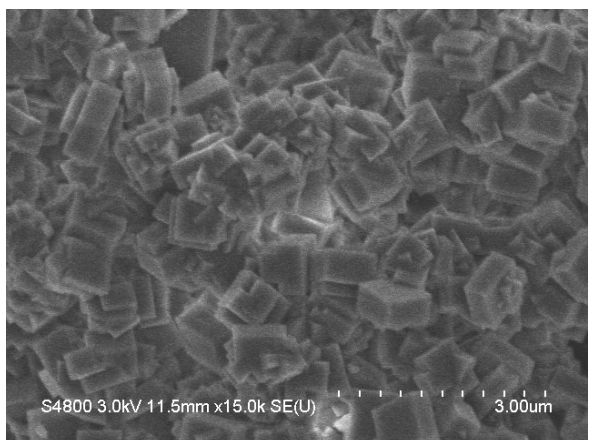

Figure S1 SEM images of SSZ-39, Cu-SSZ-39, Fe-Cu-SSZ-39

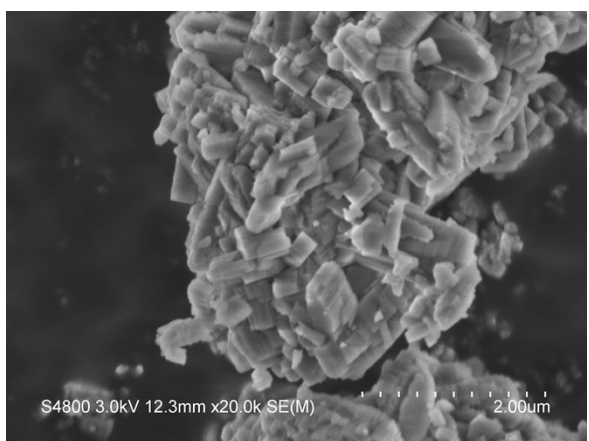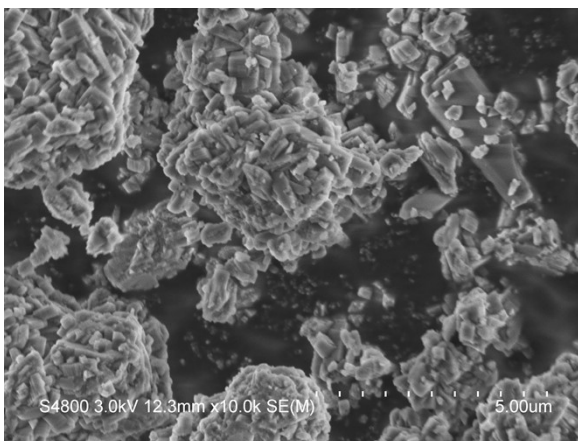

Figure S2 SEM images of commercial ZSM-5
